# Supplementary material
Source: publisher figshare collection journal article supplement (https://acs.figshare.com/ndownloader/files/5339128)
Supplement: Supplementary file 1 [file 5339128]

#\#CIF_1.1
 
#  CIF produced by WinGX routine CIF_UPDATE
#  Created on 2008-01-07 at 11:00:49
#  Using CIFtbx version 2.6.2 16 Jun 1998
 
#  Dictionary name : cif_core.dic
#  Dictionary vers : 2.3
#  Request file    : c:\wingx\files\archive.dat
#  CIF files read  : ck100ms
 
#
#     CCDC ELECTRONIC DATA DEPOSITION FORM (CIF)
#
#     This electronic data deposition form can be used:
#
#     (a) WHEN SUBMITTING A PAPER TO A JOURNAL FOR PUBLICATION or
#     (b) WHEN SUBMITTING A PRIVATE COMMUNICATION TO THE CCDC
#
#     A comprehensive archive of CIF resources is maintained by the IUCr
#     at its Chester office. This can be accessed
#     by anonymous ftp to ftp.iucr.org
#     or via the WWW at http://www.iucr.org/cif/home.html
#     If data items in this form are not available or not applicable
#     then ignore these items
#     A few items specific to CCDC input are indicated by _ccdc_
#
#     Submission and help information is provided at the end of this form
#-------------------------------------------------------------------------
#1    Global data block identification for start of deposition
 
data_global
 
#
#-------------------------------------------------------------------------
#2    Person making the deposition
#
_publ_contact_author               'Pulpoka, Buncha'
_publ_contact_author_email          Buncha.P@chula.ac.th
 
#-------------------------------------------------------------------------
#3    Publication details
#
#     Provide these details if the structure has been published,
#     accepted or submitted for publication
#
#     The CCDC journal deposition number, eg. 182/357,
#     should be included only if it has been assigned by the journal
#
loop_
_publ_author_name
 
'Pulpoka, Buncha'
 
_journal_name_full                 'Organic Letters'
_journal_volume                    ?
_journal_page_first                ?
_journal_page_last                 ?
_journal_year                      ?
_ccdc_journal_depnumber            ?
#
#-------------------------------------------------------------------------
#4    Chemical and physical data
#
#     Note that the units for melting point are Kelvin
#     The compound_id is the identifier for the compound in the published
#       paper, eg. 4a, II, etc.
#     Provide a brief description of any significant biological activity,
#       eg. antimalarial activity
#     If the compound exhibits polymorphism provide brief details,
#       eg. monoclinic form, low-temperature phase, etc.
#     For chemdiag  leave blank - no longer necessary
 
_ccdc_compound_id                  ?
_ccdc_biological_activity          ?
_ccdc_polymorph                    ?
 
_ccdc_chemdiag_type                ?
_ccdc_chemdiag_records
;
?
;
#
#-------------------------------------------------------------------------
#5    Other data relating to the structure determination and refinement
#
#     Record the radiation type if not X-rays, eg. neutron
#     Record the temperature of the data collection (Kelvin)
#       if not room-temperature
#     Record R_squared if this is the only reliability factor given by
#       your refinement program
#     Describe briefly any disorder, eg. t-Butyl C31-33 disordered over
#       two sites with occupancies 0.6 and 0.4
#     Under ccdc_comments record any other important information
 
_ccdc_temp_data_collection          ?
_ccdc_ls_R_squared                  ?
_ccdc_disorder                      ?
_ccdc_comments
;
?
;
#-------------------------------------------------------------------------
#6    Include your "standard" CIF file here
#     It should contain the following data items:
#       unit cell parameters and volume, z value, space group symbol,
#       R-factor(s), atomic coordinates with standard deviations,
#       occupancy factors, bond lengths and bond angles
#     Other data items may be present but will not necessarily be
#       included in the Cambridge Structural Database
#
#     Do NOT include structure factors
#
#
#-------------------------------------------------------------------------
#SUBMISSION INFORMATION
#
#     For a journal send the form to the address specified by the journal
#
#     For a private communication to the CCDC send the form to the address
#       deposit@ccdc.cam.ac.uk
#
#     For up-to-date information on deposition procedures, check the website
#       http://www.ccdc.cam.ac.uk/
 
data_ck100ms
 
_audit_creation_date                    2008-01-07T11:00:49-00:00
_audit_creation_method                  'WinGX routine CIF_UPDATE'
 
#----------------------------------------------------------------------------#
#                   CHEMICAL INFORMATION                                     #
#----------------------------------------------------------------------------#
 
_chemical_name_systematic
;
 ?
;
_chemical_formula_sum                   'C57 H60 Cl3 N3 O6'
_chemical_formula_weight                989.43
 
#----------------------------------------------------------------------------#
#                   UNIT CELL INFORMATION                                    #
#----------------------------------------------------------------------------#
 
loop_
    _symmetry_equiv_pos_as_xyz
'x, y, z'
'-x, -y, -z'
 
_cell_length_a                          13.3761(6)
_cell_length_b                          14.4152(7)
_cell_length_c                          28.8382(14)
_cell_angle_alpha                       93.6220(10)
_cell_angle_beta                        96.2840(10)
_cell_angle_gamma                       92.6350(10)
_cell_volume                            5508.3(5)
_cell_formula_units_Z                   4
_cell_measurement_temperature           293(2)
 
#----------------------------------------------------------------------------#
#                   CRYSTAL INFORMATION                                      #
#----------------------------------------------------------------------------#
 
_exptl_crystal_density_diffrn           1.193
_exptl_crystal_density_method           'not measured'
_exptl_crystal_F_000                    2088
_exptl_special_details
;
 ?
;
 
#----------------------------------------------------------------------------#
#                   ABSORPTION CORRECTION                                    #
#----------------------------------------------------------------------------#
 
_exptl_absorpt_coefficient_mu           0.216
_exptl_absorpt_correction_type          none
 
#----------------------------------------------------------------------------#
#                   DATA COLLECTION                                          #
#----------------------------------------------------------------------------#
 
_diffrn_ambient_temperature             293(2)
_diffrn_radiation_wavelength            0.71073
_diffrn_radiation_type                  MoK\a
_diffrn_radiation_monochromator         graphite
_diffrn_reflns_av_R_equivalents         0.0212
_diffrn_reflns_av_unetI/netI            0.0542
_diffrn_reflns_number                   39405
_diffrn_reflns_limit_h_min              -19
_diffrn_reflns_limit_h_max              14
_diffrn_reflns_limit_k_min              -19
_diffrn_reflns_limit_k_max              20
_diffrn_reflns_limit_l_min              -40
_diffrn_reflns_limit_l_max              30
_diffrn_reflns_theta_min                1.42
_diffrn_reflns_theta_max                30.55
_diffrn_reflns_theta_full               30.55
_diffrn_measured_fraction_theta_full
                                        0.854
_diffrn_measured_fraction_theta_max
                                        0.854
_reflns_number_total                    28866
_reflns_number_gt                       16512
_reflns_threshold_expression            >2sigma(I)
 
#----------------------------------------------------------------------------#
#                   COMPUTER PROGRAMS USED                                   #
#----------------------------------------------------------------------------#
 
_computing_structure_refinement         'SHELXL-97 (Sheldrick, 1997)'
 
#----------------------------------------------------------------------------#
#                   REFINEMENT INFORMATION                                   #
#----------------------------------------------------------------------------#
 
_refine_special_details
;
 Refinement of F^2^ against ALL reflections.  The weighted R-factor wR and
 goodness of fit S are based on F^2^, conventional R-factors R are based
 on F, with F set to zero for negative F^2^. The threshold expression of
 F^2^ > 2sigma(F^2^) is used only for calculating R-factors(gt) etc. and is
 not relevant to the choice of reflections for refinement.  R-factors based
 on F^2^ are statistically about twice as large as those based on F, and R-
 factors based on ALL data will be even larger.
;
_refine_ls_structure_factor_coef        Fsqd
_refine_ls_matrix_type                  full
_refine_ls_weighting_scheme             calc
_refine_ls_weighting_details
         'calc w=1/[\s^2^(Fo^2^)+(0.0777P)^2^+5.2421P] where P=(Fo^2^+2Fc^2^)/3'
_atom_sites_solution_primary            direct
_atom_sites_solution_secondary          difmap
_atom_sites_solution_hydrogens          geom
_refine_ls_hydrogen_treatment           mixed
_refine_ls_extinction_method            none
_refine_ls_number_reflns                28866
_refine_ls_number_parameters            1267
_refine_ls_number_restraints            0
_refine_ls_R_factor_all                 0.1617
_refine_ls_R_factor_gt                  0.0981
_refine_ls_wR_factor_ref                0.2606
_refine_ls_wR_factor_gt                 0.2165
_refine_ls_goodness_of_fit_ref          1.106
_refine_ls_restrained_S_all             1.106
_refine_ls_shift/su_max                 0.179
_refine_ls_shift/su_mean                0.008
_refine_diff_density_max                0.797
_refine_diff_density_min                -0.388
_refine_diff_density_rms                0.055
 
#----------------------------------------------------------------------------#
#                   ATOMIC TYPES, COORDINATES AND THERMAL PARAMETERS         #
#----------------------------------------------------------------------------#
 
loop_
    _atom_type_symbol
    _atom_type_description
    _atom_type_scat_dispersion_real
    _atom_type_scat_dispersion_imag
    _atom_type_scat_source
C C 0.0033 0.0016 'International Tables Vol C Tables 4.2.6.8 and 6.1.1.4'
H H 0 0 'International Tables Vol C Tables 4.2.6.8 and 6.1.1.4'
N N 0.0061 0.0033 'International Tables Vol C Tables 4.2.6.8 and 6.1.1.4'
O O 0.0106 0.006 'International Tables Vol C Tables 4.2.6.8 and 6.1.1.4'
Cl Cl 0.1484 0.1585 'International Tables Vol C Tables 4.2.6.8 and 6.1.1.4'
 
loop_
    _atom_site_label
    _atom_site_type_symbol
    _atom_site_fract_x
    _atom_site_fract_y
    _atom_site_fract_z
    _atom_site_U_iso_or_equiv
    _atom_site_adp_type
    _atom_site_occupancy
    _atom_site_symmetry_multiplicity
    _atom_site_calc_flag
    _atom_site_refinement_flags
    _atom_site_disorder_assembly
    _atom_site_disorder_group
Cl1 Cl 0.61988(8) 0.11504(9) 0.42653(5) 0.0909(4) Uani 1 1 d . . .
Cl2 Cl 0.43977(8) 0.46509(11) 0.43205(5) 0.1012(5) Uani 1 1 d . . .
Cl3 Cl -0.63344(8) -0.32967(10) 0.08133(5) 0.0895(4) Uani 1 1 d . . .
Cl4 Cl 0.38779(10) 0.45206(10) 0.29782(5) 0.0981(4) Uani 1 1 d . . .
Cl5 Cl -0.43077(9) -0.03752(11) 0.08285(6) 0.1083(5) Uani 1 1 d . . .
Cl6 Cl -0.33742(13) -0.02506(11) 0.22911(7) 0.1227(6) Uani 1 1 d . . .
O3 O -0.06001(16) -0.15470(16) 0.01079(9) 0.0543(6) Uani 1 1 d . . .
O5 O 0.04809(17) 0.33908(16) 0.48560(8) 0.0527(5) Uani 1 1 d . . .
O4 O 0.00654(18) 0.29749(17) 0.35072(8) 0.0575(6) Uani 1 1 d . . .
O2 O -0.24006(18) -0.46118(18) 0.04372(10) 0.0638(7) Uani 1 1 d . . .
O1 O -0.00838(18) -0.18374(17) 0.13702(9) 0.0605(6) Uani 1 1 d . . .
N2 N -0.2462(2) -0.35917(19) 0.16715(10) 0.0495(6) Uiso 1 1 d . . .
N4 N 0.2352(2) 0.1174(2) 0.32540(10) 0.0536(7) Uiso 1 1 d . . .
C001 C -0.2370(2) -0.1837(2) 0.01583(12) 0.0489(7) Uani 1 1 d . . .
N3 N -0.3369(2) -0.3006(2) -0.04105(10) 0.0545(7) Uiso 1 1 d . . .
O6 O 0.18940(18) 0.04603(17) 0.44219(9) 0.0612(6) Uani 1 1 d . . .
C002 C -0.3983(2) -0.4013(2) 0.01580(12) 0.0518(8) Uani 1 1 d . . .
C003 C 0.1454(3) 0.4417(2) 0.44406(11) 0.0496(7) Uani 1 1 d . . .
C004 C 0.0974(3) 0.3348(2) 0.33890(11) 0.0496(7) Uani 1 1 d . . .
C005 C -0.1473(2) -0.1312(2) 0.03011(12) 0.0465(7) Uani 1 1 d . . .
C006 C 0.3576(3) 0.0875(2) 0.47930(13) 0.0560(8) Uani 1 1 d . . .
N5 N 0.3099(2) 0.2043(2) 0.53737(10) 0.0556(7) Uiso 1 1 d . . .
C007 C 0.1411(2) 0.3649(2) 0.47076(11) 0.0480(7) Uani 1 1 d . . .
C008 C -0.1427(2) -0.0514(2) 0.06040(12) 0.0513(8) Uani 1 1 d . . .
N1 N -0.0375(2) 0.0669(2) 0.11520(10) 0.0552(7) Uiso 1 1 d . . .
C009 C 0.2392(3) 0.4722(3) 0.43278(12) 0.0571(9) Uani 1 1 d . . .
H009 H 0.2452 0.5242 0.4156 0.068 Uiso 1 1 calc R . .
N6 N 0.0560(2) 0.5508(2) 0.39024(10) 0.0522(7) Uiso 1 1 d . . .
C010 C 0.3251(3) 0.0540(2) 0.39463(13) 0.0527(8) Uani 1 1 d . . .
C011 C -0.3342(2) -0.4314(2) 0.05255(13) 0.0517(8) Uani 1 1 d . . .
O18 O 0.0058(2) -0.0051(2) 0.40882(12) 0.0832(9) Uani 1 1 d . . .
C012 C -0.2569(3) -0.4108(2) 0.24703(13) 0.0546(8) Uani 1 1 d . . .
C013 C -0.2828(3) -0.4455(2) 0.13942(13) 0.0544(8) Uani 1 1 d . . .
H01A H -0.3146 -0.4875 0.1591 0.065 Uiso 1 1 calc R . .
H01B H -0.2263 -0.476 0.1279 0.065 Uiso 1 1 calc R . .
C014 C 0.2543(3) 0.0329(2) 0.35043(13) 0.0559(8) Uani 1 1 d . . .
H01C H 0.2831 -0.0125 0.3302 0.067 Uiso 1 1 calc R . .
H01D H 0.191 0.0059 0.3582 0.067 Uiso 1 1 calc R . .
C015 C 0.2923(3) 0.0605(2) 0.43904(13) 0.0541(8) Uani 1 1 d . . .
C016 C 0.2258(3) 0.3179(2) 0.48563(12) 0.0515(8) Uani 1 1 d . . .
C017 C 0.0514(3) 0.4934(3) 0.43070(13) 0.0570(9) Uani 1 1 d . . .
H01E H -0.0052 0.4483 0.4238 0.068 Uiso 1 1 calc R . .
H01F H 0.0384 0.5334 0.4575 0.068 Uiso 1 1 calc R . .
C018 C -0.1715(3) -0.2010(2) 0.16208(12) 0.0537(8) Uani 1 1 d . . .
C019 C -0.0148(3) 0.6257(3) 0.39407(13) 0.0598(9) Uani 1 1 d . . .
H01G H -0.002 0.6571 0.4251 0.072 Uiso 1 1 calc R . .
H01H H -0.083 0.598 0.3907 0.072 Uiso 1 1 calc R . .
C020 C -0.1838(3) -0.3000(2) 0.14096(13) 0.0561(8) Uani 1 1 d . . .
H02A H -0.2145 -0.3003 0.1089 0.067 Uiso 1 1 calc R . .
H02B H -0.118 -0.3254 0.1406 0.067 Uiso 1 1 calc R . .
C021 C -0.2314(3) -0.0232(3) 0.07630(13) 0.0572(9) Uani 1 1 d . . .
H021 H -0.231 0.0302 0.0962 0.069 Uiso 1 1 calc R . .
C022 C -0.3573(2) -0.4255(2) 0.09878(13) 0.0504(8) Uani 1 1 d . . .
C023 C -0.3201(3) -0.0746(3) 0.06253(14) 0.0607(9) Uani 1 1 d . . .
C024 C 0.3231(3) 0.4254(3) 0.44704(13) 0.0612(9) Uani 1 1 d . . .
C025 C -0.4504(3) -0.3942(2) 0.10697(14) 0.0557(8) Uani 1 1 d . . .
H025 H -0.469 -0.3913 0.1372 0.067 Uiso 1 1 calc R . .
C026 C 0.1774(3) 0.2774(2) 0.33632(12) 0.0535(8) Uani 1 1 d . . .
C027 C -0.0861(3) -0.1437(2) 0.15814(13) 0.0537(8) Uani 1 1 d . . .
C028 C 0.0279(3) 0.4958(2) 0.34517(13) 0.0587(9) Uani 1 1 d . . .
H02C H 0.0173 0.5378 0.3203 0.07 Uiso 1 1 calc R . .
H02D H -0.0349 0.4602 0.3465 0.07 Uiso 1 1 calc R . .
C029 C 0.0276(3) 0.2249(2) 0.14773(13) 0.0573(9) Uani 1 1 d . . .
C030 C 0.3182(3) 0.3487(3) 0.47321(13) 0.0609(9) Uani 1 1 d . . .
H030 H 0.3761 0.3182 0.4824 0.073 Uiso 1 1 calc R . .
C031 C -0.5156(2) -0.3673(3) 0.07072(14) 0.0585(9) Uani 1 1 d . . .
C032 C -0.2378(3) -0.2716(3) -0.01562(14) 0.0581(9) Uani 1 1 d . . .
H03A H -0.1902 -0.2623 -0.0382 0.07 Uiso 1 1 calc R . .
H03B H -0.2149 -0.3216 0.0032 0.07 Uiso 1 1 calc R . .
C033 C 0.1081(3) 0.4303(2) 0.33410(12) 0.0533(8) Uani 1 1 d . . .
C034 C -0.0436(3) 0.0047(3) 0.07269(14) 0.0602(9) Uani 1 1 d . . .
H03C H 0.0101 -0.0381 0.0763 0.072 Uiso 1 1 calc R . .
H03D H -0.0318 0.0417 0.0467 0.072 Uiso 1 1 calc R . .
C035 C 0.4266(3) 0.0721(2) 0.39130(14) 0.0610(9) Uani 1 1 d . . .
H035 H 0.4504 0.0684 0.3622 0.073 Uiso 1 1 calc R . .
C036 C 0.2661(3) 0.0612(3) 0.24565(12) 0.0579(9) Uani 1 1 d . . .
C037 C -0.4902(2) -0.3699(2) 0.02564(13) 0.0564(9) Uani 1 1 d . . .
H037 H -0.5351 -0.3504 0.0017 0.068 Uiso 1 1 calc R . .
C038 C -0.0016(3) 0.0193(3) 0.15742(15) 0.0681(11) Uani 1 1 d . . .
H03E H 0.0174 0.0654 0.1832 0.082 Uiso 1 1 calc R . .
H03F H 0.0577 -0.0139 0.1516 0.082 Uiso 1 1 calc R . .
C039 C -0.0033(3) 0.2593(3) 0.46053(13) 0.0564(8) Uani 1 1 d . . .
H03G H 0.0277 0.2037 0.4711 0.068 Uiso 1 1 calc R . .
H03H H 0.0037 0.262 0.4275 0.068 Uiso 1 1 calc R . .
C040 C 0.4587(3) 0.1045(3) 0.47431(15) 0.0625(10) Uani 1 1 d . . .
H040 H 0.5041 0.1222 0.5005 0.075 Uiso 1 1 calc R . .
C041 C -0.3691(3) -0.3965(2) -0.03308(13) 0.0571(9) Uani 1 1 d . . .
H04A H -0.3147 -0.4373 -0.0374 0.068 Uiso 1 1 calc R . .
H04B H -0.4261 -0.4174 -0.0556 0.068 Uiso 1 1 calc R . .
C042 C -0.3241(3) -0.1531(3) 0.03281(14) 0.0596(9) Uani 1 1 d . . .
H042 H -0.3853 -0.1861 0.024 0.072 Uiso 1 1 calc R . .
O12 O 0.1356(2) -0.1371(2) 0.02296(16) 0.1035(12) Uani 1 1 d . . .
C043 C -0.0079(3) 0.6965(2) 0.35845(13) 0.0554(8) Uani 1 1 d . . .
C044 C 0.1695(3) 0.1777(2) 0.34997(14) 0.0617(9) Uani 1 1 d . . .
H04C H 0.1876 0.1766 0.3834 0.074 Uiso 1 1 calc R . .
H04D H 0.1003 0.1536 0.3429 0.074 Uiso 1 1 calc R . .
C045 C 0.1984(3) 0.4653(3) 0.32107(13) 0.0610(9) Uani 1 1 d . . .
H045 H 0.2066 0.5281 0.316 0.073 Uiso 1 1 calc R . .
C046 C 0.2760(3) 0.4078(3) 0.31560(14) 0.0628(9) Uani 1 1 d . . .
C047 C 0.3234(3) 0.1049(3) 0.52733(13) 0.0591(9) Uani 1 1 d . . .
H04E H 0.2602 0.0699 0.5288 0.071 Uiso 1 1 calc R . .
H04F H 0.373 0.0835 0.5508 0.071 Uiso 1 1 calc R . .
C048 C 0.2673(3) 0.3149(3) 0.32433(14) 0.0618(9) Uani 1 1 d . . .
H048 H 0.3218 0.2776 0.3222 0.074 Uiso 1 1 calc R . .
C049 C -0.3389(3) -0.2858(3) -0.09092(14) 0.0722(11) Uani 1 1 d . . .
H04G H -0.2972 -0.3305 -0.1049 0.087 Uiso 1 1 calc R . .
H04H H -0.3095 -0.2241 -0.0942 0.087 Uiso 1 1 calc R . .
C050 C 0.4921(3) 0.0953(3) 0.43072(16) 0.0620(10) Uani 1 1 d . . .
O15 O -0.1627(2) 0.1819(2) 0.45524(14) 0.1014(11) Uani 1 1 d . . .
C051 C 0.4194(3) 0.2178(3) 0.61302(14) 0.0691(11) Uani 1 1 d . . .
C052 C -0.0625(3) 0.2639(3) 0.15493(16) 0.0748(11) Uani 1 1 d . . .
H052 H -0.1222 0.2374 0.139 0.09 Uiso 1 1 calc R . .
C053 C -0.2332(3) -0.5595(3) 0.04044(16) 0.0700(11) Uani 1 1 d . . .
H05A H -0.2564 -0.5834 0.0087 0.084 Uiso 1 1 calc R . .
H05B H -0.2774 -0.5868 0.061 0.084 Uiso 1 1 calc R . .
C054 C 0.1902(3) 0.0933(3) 0.27698(13) 0.0607(9) Uani 1 1 d . . .
H05A H 0.1591 0.1474 0.2646 0.073 Uiso 1 1 calc R . .
H05B H 0.1379 0.0445 0.277 0.073 Uiso 1 1 calc R . .
C055 C -0.2492(3) -0.1619(3) 0.18305(15) 0.0650(10) Uani 1 1 d . . .
H055 H -0.3076 -0.198 0.1856 0.078 Uiso 1 1 calc R . .
C056 C -0.0103(3) -0.2317(3) 0.02954(15) 0.0605(9) Uani 1 1 d . . .
H05C H -0.0213 -0.2849 0.0069 0.073 Uiso 1 1 calc R . .
H05D H -0.0397 -0.2481 0.0574 0.073 Uiso 1 1 calc R . .
C057 C -0.0818(3) -0.0485(3) 0.17070(14) 0.0609(9) Uani 1 1 d . . .
C058 C -0.4420(3) -0.2946(3) -0.11737(15) 0.0700(11) Uani 1 1 d . . .
C059 C -0.1902(3) -0.3816(3) 0.21114(13) 0.0579(9) Uani 1 1 d . . .
H05C H -0.1481 -0.3275 0.224 0.07 Uiso 1 1 calc R . .
H05D H -0.1463 -0.4314 0.2047 0.07 Uiso 1 1 calc R . .
C060 C 0.1002(3) -0.2116(3) 0.04161(18) 0.0772(12) Uani 1 1 d . . .
C061 C 0.2149(3) 0.2330(3) 0.51337(14) 0.0608(9) Uani 1 1 d . . .
H06A H 0.169 0.2459 0.5365 0.073 Uiso 1 1 calc R . .
H06B H 0.1849 0.1816 0.4924 0.073 Uiso 1 1 calc R . .
C062 C -0.3441(3) -0.3673(3) 0.25421(16) 0.0712(11) Uani 1 1 d . . .
H062 H -0.3663 -0.3225 0.2342 0.085 Uiso 1 1 calc R . .
O8 O 0.2007(3) -0.2767(2) 0.20229(16) 0.1150(14) Uani 1 1 d . . .
O10 O -0.0667(3) -0.5202(3) 0.06900(16) 0.1141(13) Uani 1 1 d . . .
C063 C 0.1139(3) 0.2649(3) 0.17307(15) 0.0718(11) Uani 1 1 d . . .
H063 H 0.1755 0.2393 0.1696 0.086 Uiso 1 1 calc R . .
O11 O 0.1507(2) -0.2614(3) 0.06494(16) 0.1164(14) Uani 1 1 d . . .
C064 C -0.0943(3) 0.7269(3) 0.33471(14) 0.0681(10) Uani 1 1 d . . .
H064 H -0.1567 0.7009 0.3399 0.082 Uiso 1 1 calc R . .
C065 C 0.0319(3) 0.1474(3) 0.11079(15) 0.0652(10) Uani 1 1 d . . .
H06C H 0.0159 0.1712 0.0803 0.078 Uiso 1 1 calc R . .
H06D H 0.1001 0.1267 0.1125 0.078 Uiso 1 1 calc R . .
C066 C 0.0839(4) 0.7356(3) 0.34924(18) 0.0800(12) Uani 1 1 d . . .
H066 H 0.1434 0.7164 0.3646 0.096 Uiso 1 1 calc R . .
C067 C -0.1595(3) -0.0128(3) 0.19345(15) 0.0729(11) Uani 1 1 d . . .
H067 H -0.1564 0.0497 0.2041 0.087 Uiso 1 1 calc R . .
O16 O -0.1441(2) 0.3299(3) 0.48345(19) 0.145(2) Uani 1 1 d . . .
C068 C -0.2411(3) -0.0704(3) 0.20011(16) 0.0728(11) Uani 1 1 d . . .
C069 C 0.0850(3) -0.1852(3) 0.16603(17) 0.0724(11) Uani 1 1 d . . .
H06E H 0.0843 -0.1414 0.1929 0.087 Uiso 1 1 calc R . .
H06F H 0.1392 -0.1648 0.1486 0.087 Uiso 1 1 calc R . .
C070 C -0.1118(3) 0.2529(3) 0.46696(16) 0.0717(11) Uani 1 1 d . . .
C071 C -0.0692(3) 0.2752(3) 0.31227(15) 0.0750(12) Uani 1 1 d . . .
H07A H -0.0586 0.2146 0.2975 0.09 Uiso 1 1 calc R . .
H07B H -0.0653 0.321 0.2892 0.09 Uiso 1 1 calc R . .
C072 C 0.2728(3) -0.0321(3) 0.23226(14) 0.0690(10) Uani 1 1 d . . .
H072 H 0.2301 -0.0761 0.2434 0.083 Uiso 1 1 calc R . .
C073 C -0.2270(3) -0.4777(3) 0.27690(16) 0.0748(12) Uani 1 1 d . . .
H073 H -0.1697 -0.5097 0.2724 0.09 Uiso 1 1 calc R . .
C074 C 0.3168(3) 0.2295(3) 0.58730(14) 0.0667(10) Uani 1 1 d . . .
H07A H 0.2674 0.1914 0.6008 0.08 Uiso 1 1 calc R . .
H07B H 0.3 0.294 0.5919 0.08 Uiso 1 1 calc R . .
C075 C 0.0451(4) -0.0596(4) 0.43891(16) 0.0876(15) Uani 1 1 d . . .
C076 C 0.1105(4) 0.3426(4) 0.20362(16) 0.0882(15) Uani 1 1 d . . .
H076 H 0.1695 0.3684 0.2205 0.106 Uiso 1 1 calc R . .
O13 O -0.1838(3) 0.3026(5) 0.36738(18) 0.167(2) Uani 1 1 d . . .
O7 O 0.0496(3) -0.3444(3) 0.18023(18) 0.1234(16) Uani 1 1 d . . .
C077 C 0.1579(4) -0.0477(3) 0.44876(17) 0.0825(14) Uani 1 1 d . . .
H07C H 0.1788 -0.0622 0.4806 0.099 Uiso 1 1 calc R . .
H07D H 0.1889 -0.09 0.4278 0.099 Uiso 1 1 calc R . .
C078 C 0.1061(3) -0.2789(3) 0.18272(18) 0.0776(12) Uani 1 1 d . . .
C079 C -0.3675(4) -0.4533(4) 0.32021(18) 0.0875(14) Uani 1 1 d . . .
H079 H -0.4036 -0.4674 0.3449 0.105 Uiso 1 1 calc R . .
C080 C 0.0205(5) 0.3816(4) 0.20901(17) 0.0914(15) Uani 1 1 d . . .
H080 H 0.0184 0.4349 0.2287 0.11 Uiso 1 1 calc R . .
C081 C -0.1297(4) -0.5880(4) 0.05302(16) 0.0785(13) Uani 1 1 d . . .
C082 C 0.3310(4) 0.1249(4) 0.22913(17) 0.0856(13) Uani 1 1 d . . .
H082 H 0.3281 0.1879 0.2378 0.103 Uiso 1 1 calc R . .
C083 C 0.5019(4) 0.2665(4) 0.6019(2) 0.1025(17) Uani 1 1 d . . .
H083 H 0.496 0.3054 0.5774 0.123 Uiso 1 1 calc R . .
O9 O -0.1074(3) -0.6669(3) 0.04899(15) 0.1228(15) Uani 1 1 d . . .
C084 C -0.3994(4) -0.3883(4) 0.29037(17) 0.0824(13) Uani 1 1 d . . .
H084 H -0.4581 -0.3581 0.2943 0.099 Uiso 1 1 calc R . .
C085 C -0.2808(4) -0.4977(4) 0.31328(19) 0.0946(16) Uani 1 1 d . . .
H085 H -0.2584 -0.5419 0.3336 0.113 Uiso 1 1 calc R . .
C086 C -0.0896(5) 0.7954(3) 0.30326(16) 0.0878(15) Uani 1 1 d . . .
H086 H -0.1487 0.8157 0.288 0.105 Uiso 1 1 calc R . .
O14 O -0.2389(3) 0.2382(4) 0.29682(17) 0.1375(17) Uani 1 1 d . . .
C087 C -0.0651(4) 0.3418(4) 0.18542(19) 0.0905(14) Uani 1 1 d . . .
H087 H -0.1266 0.3669 0.1897 0.109 Uiso 1 1 calc R . .
C088 C 0.3408(4) -0.0607(4) 0.20308(18) 0.0953(15) Uani 1 1 d . . .
H088 H 0.3439 -0.1237 0.1946 0.114 Uiso 1 1 calc R . .
O17 O -0.0001(4) -0.1218(4) 0.45403(17) 0.174(3) Uani 1 1 d . . .
C089 C 0.0005(6) 0.8328(3) 0.29473(19) 0.0988(17) Uani 1 1 d . . .
H089 H 0.0034 0.8787 0.2736 0.119 Uiso 1 1 calc R . .
C090 C -0.4632(5) -0.3534(4) -0.15731(18) 0.0960(16) Uani 1 1 d . . .
H090 H -0.4136 -0.3906 -0.1673 0.115 Uiso 1 1 calc R . .
C091 C 0.4318(5) 0.1610(4) 0.64979(18) 0.0966(16) Uani 1 1 d . . .
H091 H 0.3765 0.1275 0.6584 0.116 Uiso 1 1 calc R . .
C092 C 0.0873(5) 0.8033(4) 0.3171(2) 0.1012(17) Uani 1 1 d . . .
H092 H 0.1492 0.8288 0.3109 0.121 Uiso 1 1 calc R . .
C093 C -0.1029(4) -0.0159(4) 0.3957(2) 0.1008(17) Uani 1 1 d . . .
H09A H -0.1229 -0.081 0.3877 0.121 Uiso 1 1 calc R . .
H09B H -0.1381 0.0057 0.4217 0.121 Uiso 1 1 calc R . .
C094 C 0.4005(4) 0.0961(6) 0.1996(2) 0.112(2) Uani 1 1 d . . .
H094 H 0.4445 0.1395 0.1888 0.134 Uiso 1 1 calc R . .
C095 C 0.0368(5) -0.5414(6) 0.0888(3) 0.159(3) Uani 1 1 d . . .
H09C H 0.0465 -0.5234 0.122 0.19 Uiso 1 1 calc R . .
H09D H 0.0455 -0.6077 0.0846 0.19 Uiso 1 1 calc R . .
C096 C 0.5260(7) 0.1535(5) 0.6739(3) 0.140(3) Uani 1 1 d . . .
H096 H 0.5335 0.1125 0.6975 0.168 Uiso 1 1 calc R . .
C097 C -0.5578(7) -0.3577(6) -0.1827(2) 0.130(3) Uani 1 1 d . . .
H097 H -0.5711 -0.3984 -0.2092 0.156 Uiso 1 1 calc R . .
C098 C -0.1695(4) 0.2743(5) 0.3293(2) 0.0948(17) Uani 1 1 d . . .
C099 C -0.5172(4) -0.2421(4) -0.1034(2) 0.1018(16) Uani 1 1 d . . .
H099 H -0.5056 -0.2027 -0.0763 0.122 Uiso 1 1 calc R . .
C100 C 0.2451(5) -0.1180(6) 0.0289(4) 0.165(4) Uani 1 1 d . . .
H10A H 0.2784 -0.1704 0.0419 0.198 Uiso 1 1 calc R . .
H10B H 0.2687 -0.1085 -0.0012 0.198 Uiso 1 1 calc R . .
C101 C -0.1285(5) 0.0383(5) 0.3558(3) 0.124(2) Uani 1 1 d . . .
H10C H -0.1999 0.0318 0.3467 0.186 Uiso 1 1 calc R . .
H10D H -0.0937 0.0162 0.3302 0.186 Uiso 1 1 calc R . .
H10E H -0.109 0.1026 0.3641 0.186 Uiso 1 1 calc R . .
C102 C 0.2378(5) -0.3627(5) 0.2207(4) 0.161(4) Uani 1 1 d . . .
H10C H 0.2404 -0.3585 0.2545 0.193 Uiso 1 1 calc R . .
H10D H 0.1921 -0.4149 0.2085 0.193 Uiso 1 1 calc R . .
C103 C 0.6052(7) 0.2029(7) 0.6643(4) 0.159(4) Uani 1 1 d . . .
H103 H 0.667 0.2003 0.6823 0.191 Uiso 1 1 calc R . .
C104 C -0.6299(6) -0.3042(7) -0.1695(3) 0.146(3) Uani 1 1 d . . .
H104 H -0.6922 -0.3057 -0.1875 0.175 Uiso 1 1 calc R . .
C105 C 0.4040(4) 0.0026(6) 0.1864(2) 0.112(2) Uani 1 1 d . . .
H105 H 0.4494 -0.017 0.1661 0.134 Uiso 1 1 calc R . .
C106 C 0.3307(10) -0.3766(10) 0.2082(4) 0.301(10) Uani 1 1 d . . .
H10F H 0.3548 -0.4328 0.2206 0.451 Uiso 1 1 calc R . .
H10G H 0.3758 -0.3249 0.2203 0.451 Uiso 1 1 calc R . .
H10H H 0.3277 -0.3822 0.1747 0.451 Uiso 1 1 calc R . .
C107 C -0.6119(5) -0.2474(6) -0.1298(3) 0.139(3) Uani 1 1 d . . .
H107 H -0.6629 -0.2117 -0.1201 0.167 Uiso 1 1 calc R . .
C108 C -0.3808(14) 0.1873(9) 0.2962(5) 0.286(10) Uani 1 1 d . . .
H10I H -0.451 0.1706 0.2966 0.43 Uiso 1 1 calc R . .
H10J H -0.3411 0.1425 0.312 0.43 Uiso 1 1 calc R . .
H10K H -0.3659 0.1881 0.2644 0.43 Uiso 1 1 calc R . .
C109 C 0.1009(6) -0.4974(6) 0.0684(4) 0.191(5) Uani 1 1 d . . .
H10L H 0.1675 -0.5093 0.0819 0.286 Uiso 1 1 calc R . .
H10M H 0.0909 -0.4319 0.0719 0.286 Uiso 1 1 calc R . .
H10N H 0.0931 -0.5174 0.0357 0.286 Uiso 1 1 calc R . .
C110 C -0.2908(9) 0.3918(15) 0.4641(7) 0.46(2) Uani 1 1 d . . .
H11A H -0.3617 0.3931 0.4666 0.692 Uiso 1 1 calc R . .
H11B H -0.2804 0.3789 0.432 0.692 Uiso 1 1 calc R . .
H11C H -0.2586 0.4511 0.4753 0.692 Uiso 1 1 calc R . .
C111 C -0.2530(6) 0.3278(8) 0.4889(7) 0.318(12) Uani 1 1 d . . .
H11A H -0.2847 0.2674 0.4779 0.382 Uiso 1 1 calc R . .
H11B H -0.263 0.34 0.5215 0.382 Uiso 1 1 calc R . .
C112 C 0.2672(7) -0.0395(10) 0.0584(5) 0.238(6) Uani 1 1 d . . .
H11D H 0.3386 -0.0257 0.0624 0.357 Uiso 1 1 calc R . .
H11E H 0.2446 -0.0498 0.0882 0.357 Uiso 1 1 calc R . .
H11F H 0.2338 0.012 0.0453 0.357 Uiso 1 1 calc R . .
C113 C 0.5955(5) 0.2582(7) 0.6274(3) 0.146(3) Uani 1 1 d . . .
H113 H 0.652 0.2906 0.6192 0.176 Uiso 1 1 calc R . .
C114 C -0.3632(11) 0.2559(10) 0.3139(5) 0.236(6) Uani 1 1 d . . .
H11C H -0.3669 0.259 0.3473 0.283 Uiso 1 1 calc R . .
H11D H -0.3976 0.306 0.2991 0.283 Uiso 1 1 calc R . .
 
loop_
    _atom_site_aniso_label
    _atom_site_aniso_U_11
    _atom_site_aniso_U_22
    _atom_site_aniso_U_33
    _atom_site_aniso_U_23
    _atom_site_aniso_U_13
    _atom_site_aniso_U_12
Cl1 0.0531(6) 0.0905(8) 0.1295(11) 0.0143(7) 0.0096(6) 0.0002(5)
Cl2 0.0568(6) 0.1358(11) 0.1157(10) 0.0560(9) 0.0105(6) -0.0115(6)
Cl3 0.0524(5) 0.1249(10) 0.0952(8) 0.0138(7) 0.0124(5) 0.0283(6)
Cl4 0.0800(8) 0.0954(9) 0.1223(11) 0.0226(8) 0.0287(7) -0.0198(6)
Cl5 0.0588(6) 0.1292(11) 0.1351(12) -0.0441(9) 0.0296(7) 0.0142(7)
Cl6 0.1184(12) 0.1003(10) 0.1589(15) -0.0078(10) 0.0586(11) 0.0282(9)
O3 0.0422(12) 0.0557(14) 0.0670(15) 0.0067(12) 0.0113(11) 0.0082(10)
O5 0.0499(12) 0.0539(13) 0.0535(13) 0.0045(11) 0.0039(10) -0.0042(10)
O4 0.0589(14) 0.0595(15) 0.0548(14) 0.0092(12) 0.0084(11) -0.0006(11)
O2 0.0494(13) 0.0610(15) 0.0826(18) 0.0093(13) 0.0076(12) 0.0130(11)
O1 0.0511(13) 0.0607(15) 0.0690(16) 0.0100(13) 0.0021(12) 0.0003(11)
C001 0.0455(17) 0.0479(18) 0.0534(19) 0.0038(15) 0.0050(14) 0.0039(14)
O6 0.0572(14) 0.0611(15) 0.0640(16) 0.0127(12) 0.0039(12) -0.0155(11)
C002 0.0472(17) 0.0483(18) 0.057(2) 0.0014(16) -0.0048(15) -0.0014(14)
C003 0.0536(18) 0.0488(18) 0.0444(17) 0.0044(14) -0.0026(14) -0.0008(14)
C004 0.0570(19) 0.0497(19) 0.0414(17) 0.0033(14) 0.0044(14) -0.0028(15)
C005 0.0399(15) 0.0475(18) 0.0530(19) 0.0072(15) 0.0052(13) 0.0061(13)
C006 0.062(2) 0.0468(19) 0.058(2) 0.0120(16) -0.0043(17) 0.0036(15)
C007 0.0486(17) 0.0497(18) 0.0442(17) 0.0037(14) 0.0015(14) -0.0035(14)
C008 0.0505(18) 0.0450(18) 0.058(2) 0.0044(16) 0.0033(15) 0.0046(14)
C009 0.061(2) 0.056(2) 0.052(2) 0.0139(17) -0.0010(16) -0.0072(16)
C010 0.058(2) 0.0411(17) 0.059(2) 0.0055(15) 0.0064(16) -0.0002(14)
C011 0.0429(16) 0.0470(18) 0.064(2) 0.0013(16) 0.0028(15) 0.0037(14)
O18 0.0640(17) 0.085(2) 0.100(2) 0.0154(18) 0.0094(16) -0.0203(15)
C012 0.0542(19) 0.0505(19) 0.056(2) 0.0085(16) -0.0084(16) -0.0048(15)
C013 0.0532(19) 0.0508(19) 0.059(2) 0.0136(16) -0.0027(16) 0.0038(15)
C014 0.066(2) 0.0436(18) 0.056(2) 0.0045(16) -0.0001(17) -0.0004(16)
C015 0.0536(19) 0.0476(18) 0.061(2) 0.0125(16) 0.0009(16) -0.0015(15)
C016 0.0507(18) 0.0540(19) 0.0487(19) 0.0093(15) -0.0018(14) 0.0005(15)
C017 0.059(2) 0.055(2) 0.058(2) 0.0129(17) 0.0015(16) 0.0048(16)
C018 0.057(2) 0.0497(19) 0.054(2) 0.0131(16) 0.0007(16) 0.0019(15)
C019 0.069(2) 0.054(2) 0.059(2) 0.0084(17) 0.0108(18) 0.0112(17)
C020 0.0535(19) 0.052(2) 0.061(2) 0.0075(17) 0.0021(16) -0.0042(15)
C021 0.057(2) 0.052(2) 0.062(2) -0.0060(17) 0.0016(16) 0.0110(16)
C022 0.0438(16) 0.0445(17) 0.060(2) 0.0059(15) -0.0052(15) -0.0017(13)
C023 0.0461(18) 0.066(2) 0.070(2) -0.0073(19) 0.0094(16) 0.0119(16)
C024 0.0488(19) 0.074(2) 0.060(2) 0.0167(19) 0.0009(16) -0.0065(17)
C025 0.0475(18) 0.058(2) 0.061(2) 0.0058(17) 0.0051(16) -0.0006(15)
C026 0.065(2) 0.0490(19) 0.0465(18) 0.0067(15) 0.0042(16) 0.0013(16)
C027 0.0522(19) 0.0505(19) 0.058(2) 0.0117(16) -0.0021(16) 0.0009(15)
C028 0.070(2) 0.0490(19) 0.055(2) 0.0024(16) -0.0041(17) 0.0076(17)
C029 0.066(2) 0.0470(19) 0.059(2) 0.0134(16) 0.0054(17) -0.0082(16)
C030 0.052(2) 0.069(2) 0.062(2) 0.0164(19) -0.0006(17) 0.0046(17)
C031 0.0383(16) 0.067(2) 0.070(2) 0.0052(19) 0.0033(16) 0.0075(15)
C032 0.0489(18) 0.057(2) 0.066(2) -0.0103(18) 0.0050(16) 0.0020(15)
C033 0.064(2) 0.0474(18) 0.0464(18) 0.0038(15) -0.0021(15) 0.0012(15)
C034 0.055(2) 0.054(2) 0.070(2) -0.0040(18) 0.0072(17) -0.0028(16)
C035 0.068(2) 0.050(2) 0.067(2) 0.0071(18) 0.0146(19) 0.0033(17)
C036 0.057(2) 0.068(2) 0.0468(19) 0.0058(17) -0.0022(16) 0.0030(17)
C037 0.0429(17) 0.058(2) 0.065(2) 0.0081(18) -0.0071(16) 0.0015(15)
C038 0.069(2) 0.052(2) 0.079(3) 0.0131(19) -0.012(2) -0.0107(18)
C039 0.0504(18) 0.055(2) 0.063(2) 0.0066(17) 0.0018(16) -0.0036(15)
C040 0.054(2) 0.059(2) 0.071(3) 0.0065(19) -0.0095(18) 0.0023(16)
C041 0.059(2) 0.052(2) 0.056(2) -0.0032(16) -0.0026(16) -0.0018(16)
C042 0.0434(18) 0.062(2) 0.072(2) -0.0070(19) 0.0060(16) 0.0004(15)
O12 0.0455(15) 0.089(2) 0.179(4) 0.039(2) 0.0075(19) 0.0077(15)
C043 0.068(2) 0.0400(17) 0.058(2) -0.0015(15) 0.0056(17) 0.0060(15)
C044 0.076(2) 0.0470(19) 0.066(2) 0.0117(17) 0.0191(19) 0.0102(17)
C045 0.077(3) 0.0451(19) 0.058(2) 0.0073(16) -0.0001(19) -0.0066(18)
C046 0.067(2) 0.061(2) 0.059(2) 0.0056(18) 0.0062(18) -0.0105(18)
C047 0.068(2) 0.056(2) 0.052(2) 0.0142(17) -0.0043(17) 0.0014(17)
C048 0.061(2) 0.057(2) 0.067(2) 0.0046(18) 0.0101(18) 0.0026(17)
C049 0.072(3) 0.080(3) 0.066(3) 0.010(2) 0.012(2) -0.001(2)
C050 0.0476(19) 0.055(2) 0.084(3) 0.011(2) 0.0022(18) 0.0028(15)
O15 0.0610(18) 0.092(2) 0.145(3) -0.008(2) 0.0023(19) -0.0153(17)
C051 0.070(3) 0.072(3) 0.061(2) -0.007(2) -0.0092(19) 0.010(2)
C052 0.070(3) 0.066(3) 0.086(3) -0.004(2) 0.006(2) -0.009(2)
C053 0.070(2) 0.064(2) 0.075(3) -0.003(2) -0.001(2) 0.0191(19)
C054 0.060(2) 0.061(2) 0.060(2) 0.0055(18) 0.0000(17) 0.0059(17)
C055 0.059(2) 0.060(2) 0.077(3) 0.013(2) 0.0103(19) -0.0002(17)
C056 0.0509(19) 0.053(2) 0.079(3) 0.0041(19) 0.0094(18) 0.0128(16)
C057 0.066(2) 0.051(2) 0.062(2) 0.0135(17) -0.0098(18) -0.0049(17)
C058 0.069(3) 0.071(3) 0.068(3) 0.021(2) -0.001(2) -0.008(2)
C059 0.0496(18) 0.062(2) 0.061(2) 0.0151(18) -0.0068(16) 0.0009(16)
C060 0.053(2) 0.081(3) 0.101(3) 0.017(3) 0.011(2) 0.024(2)
C061 0.055(2) 0.062(2) 0.066(2) 0.0207(19) -0.0018(17) 0.0032(17)
C062 0.069(3) 0.069(3) 0.077(3) 0.017(2) 0.006(2) 0.010(2)
O8 0.077(2) 0.087(2) 0.176(4) 0.044(2) -0.030(2) 0.0121(18)
O10 0.063(2) 0.102(3) 0.172(4) 0.012(3) -0.019(2) 0.0243(19)
C063 0.073(3) 0.071(3) 0.068(3) 0.013(2) -0.007(2) -0.006(2)
O11 0.0626(19) 0.141(3) 0.155(4) 0.066(3) 0.010(2) 0.037(2)
C064 0.080(3) 0.057(2) 0.065(2) 0.0011(19) -0.004(2) 0.0111(19)
C065 0.071(2) 0.050(2) 0.073(3) 0.0056(19) 0.009(2) -0.0108(17)
C066 0.078(3) 0.060(2) 0.104(4) 0.012(2) 0.012(3) 0.001(2)
C067 0.088(3) 0.053(2) 0.075(3) 0.003(2) 0.000(2) 0.005(2)
O16 0.0502(18) 0.137(3) 0.233(5) -0.112(4) 0.025(2) -0.0120(19)
C068 0.077(3) 0.061(2) 0.083(3) 0.009(2) 0.016(2) 0.014(2)
C069 0.057(2) 0.072(3) 0.088(3) 0.019(2) -0.004(2) 0.0040(19)
C070 0.057(2) 0.076(3) 0.078(3) -0.003(2) -0.005(2) -0.010(2)
C071 0.077(3) 0.084(3) 0.061(2) 0.003(2) 0.006(2) -0.022(2)
C072 0.075(3) 0.073(3) 0.058(2) -0.005(2) 0.0068(19) 0.001(2)
C073 0.072(3) 0.074(3) 0.079(3) 0.027(2) 0.000(2) 0.004(2)
C074 0.063(2) 0.069(2) 0.065(2) 0.000(2) 0.0001(19) 0.0050(19)
C075 0.088(3) 0.105(4) 0.065(3) 0.020(3) 0.003(2) -0.049(3)
C076 0.108(4) 0.080(3) 0.066(3) -0.002(2) -0.019(3) -0.025(3)
O13 0.077(3) 0.321(8) 0.108(3) 0.023(4) 0.013(2) 0.047(4)
O7 0.078(2) 0.082(2) 0.210(5) 0.056(3) -0.007(3) -0.0031(19)
C077 0.090(3) 0.075(3) 0.079(3) 0.029(2) -0.003(2) -0.029(2)
C078 0.062(2) 0.073(3) 0.098(3) 0.019(3) 0.004(2) 0.007(2)
C079 0.084(3) 0.100(4) 0.077(3) 0.017(3) 0.009(3) -0.023(3)
C080 0.133(5) 0.074(3) 0.065(3) -0.007(2) 0.013(3) -0.007(3)
C081 0.085(3) 0.085(3) 0.066(3) -0.003(2) 0.004(2) 0.034(3)
C082 0.089(3) 0.091(3) 0.079(3) 0.017(3) 0.018(3) -0.007(3)
C083 0.073(3) 0.128(5) 0.102(4) 0.005(3) -0.007(3) -0.004(3)
O9 0.138(3) 0.103(3) 0.127(3) -0.014(2) -0.002(3) 0.067(3)
C084 0.071(3) 0.093(3) 0.085(3) 0.004(3) 0.018(2) 0.004(2)
C085 0.095(4) 0.098(4) 0.092(4) 0.051(3) -0.005(3) -0.008(3)
C086 0.125(4) 0.071(3) 0.067(3) 0.011(2) -0.007(3) 0.028(3)
O14 0.084(3) 0.188(5) 0.135(4) 0.041(3) -0.010(2) -0.049(3)
C087 0.098(4) 0.079(3) 0.096(4) -0.008(3) 0.026(3) 0.003(3)
C088 0.100(4) 0.106(4) 0.080(3) -0.014(3) 0.016(3) 0.023(3)
O17 0.140(4) 0.222(5) 0.152(4) 0.110(4) -0.025(3) -0.109(4)
C089 0.159(6) 0.063(3) 0.081(3) 0.023(3) 0.027(4) 0.021(3)
C090 0.119(4) 0.089(3) 0.074(3) 0.009(3) -0.008(3) -0.020(3)
C091 0.122(4) 0.084(3) 0.077(3) 0.003(3) -0.021(3) 0.020(3)
C092 0.118(4) 0.068(3) 0.125(5) 0.021(3) 0.042(4) -0.009(3)
C093 0.067(3) 0.100(4) 0.131(5) -0.006(4) 0.012(3) -0.025(3)
C094 0.093(4) 0.156(6) 0.089(4) 0.017(4) 0.031(3) -0.022(4)
C095 0.089(4) 0.170(7) 0.229(9) 0.097(7) 0.010(5) 0.042(5)
C096 0.176(7) 0.115(5) 0.112(5) -0.014(4) -0.073(6) 0.062(5)
C097 0.151(6) 0.129(6) 0.093(4) 0.027(4) -0.044(5) -0.063(5)
C098 0.064(3) 0.144(5) 0.077(3) 0.037(3) -0.004(3) -0.004(3)
C099 0.084(4) 0.114(4) 0.105(4) 0.009(3) -0.001(3) 0.008(3)
C100 0.058(3) 0.134(6) 0.300(12) 0.072(7) -0.018(5) -0.014(4)
C101 0.092(4) 0.117(5) 0.157(6) 0.012(5) -0.016(4) 0.010(3)
C102 0.112(5) 0.125(6) 0.246(10) 0.084(6) -0.032(6) 0.028(4)
C103 0.117(6) 0.176(9) 0.160(8) -0.054(7) -0.073(6) 0.055(6)
C104 0.102(5) 0.178(9) 0.148(8) 0.058(7) -0.038(5) -0.038(5)
C105 0.086(4) 0.174(7) 0.077(4) -0.013(4) 0.026(3) 0.018(4)
C106 0.358(17) 0.363(18) 0.258(13) 0.195(13) 0.172(13) 0.284(16)
C107 0.084(4) 0.176(8) 0.157(7) 0.038(6) -0.005(4) 0.019(4)
C108 0.45(3) 0.148(10) 0.261(16) -0.078(10) 0.144(16) -0.062(13)
C109 0.098(5) 0.150(7) 0.346(15) 0.083(8) 0.078(7) 0.024(5)
C110 0.153(10) 0.71(4) 0.45(3) -0.44(3) -0.104(13) 0.191(17)
C111 0.074(5) 0.232(12) 0.61(3) -0.289(17) 0.054(10) -0.012(6)
C112 0.095(6) 0.317(17) 0.293(15) 0.087(13) -0.030(7) -0.054(8)
C113 0.068(4) 0.200(8) 0.159(7) -0.023(6) -0.017(4) -0.008(4)
C114 0.284(16) 0.216(14) 0.206(13) -0.010(11) 0.070(11) -0.079(13)
 
 
#----------------------------------------------------------------------------#
#                   MOLECULAR GEOMETRY                                       #
#----------------------------------------------------------------------------#
 
_geom_special_details
;
 All esds (except the esd in the dihedral angle between two l.s. planes)
 are estimated using the full covariance matrix.  The cell esds are taken
 into account individually in the estimation of esds in distances, angles
 and torsion angles; correlations between esds in cell parameters are only
 used when they are defined by crystal symmetry.  An approximate (isotropic)
 treatment of cell esds is used for estimating esds involving l.s. planes.
;
loop_
    _geom_bond_atom_site_label_1
    _geom_bond_atom_site_label_2
    _geom_bond_distance
    _geom_bond_site_symmetry_2
    _geom_bond_publ_flag
Cl1 C050 1.738(4) . ?
Cl2 C024 1.745(4) . ?
Cl3 C031 1.742(3) . ?
Cl4 C046 1.740(4) . ?
Cl5 C023 1.745(4) . ?
Cl6 C068 1.740(4) . ?
O3 C005 1.395(4) . ?
O3 C056 1.425(4) . ?
O5 C007 1.401(4) . ?
O5 C039 1.425(4) . ?
O4 C004 1.391(4) . ?
O4 C071 1.428(5) . ?
O2 C011 1.393(4) . ?
O2 C053 1.422(5) . ?
O1 C027 1.391(4) . ?
O1 C069 1.427(4) . ?
N2 C059 1.463(4) . ?
N2 C020 1.466(4) . ?
N2 C013 1.470(4) . ?
N4 C044 1.470(5) . ?
N4 C054 1.472(5) . ?
N4 C014 1.473(4) . ?
C001 C042 1.391(5) . ?
C001 C005 1.397(4) . ?
C001 C032 1.510(5) . ?
N3 C049 1.465(5) . ?
N3 C041 1.468(4) . ?
N3 C032 1.471(4) . ?
O6 C015 1.396(4) . ?
O6 C077 1.427(5) . ?
C002 C037 1.381(5) . ?
C002 C011 1.393(5) . ?
C002 C041 1.508(5) . ?
C003 C009 1.389(5) . ?
C003 C007 1.391(5) . ?
C003 C017 1.517(5) . ?
C004 C026 1.389(5) . ?
C004 C033 1.395(5) . ?
C005 C008 1.394(5) . ?
C006 C040 1.387(5) . ?
C006 C015 1.397(5) . ?
C006 C047 1.516(5) . ?
N5 C074 1.455(5) . ?
N5 C047 1.467(5) . ?
N5 C061 1.469(4) . ?
C007 C016 1.389(5) . ?
C008 C021 1.388(5) . ?
C008 C034 1.516(5) . ?
N1 C034 1.465(5) . ?
N1 C065 1.472(4) . ?
N1 C038 1.480(5) . ?
C009 C024 1.373(5) . ?
N6 C017 1.478(4) . ?
N6 C028 1.482(4) . ?
N6 C019 1.475(4) . ?
C010 C035 1.386(5) . ?
C010 C015 1.397(5) . ?
C010 C014 1.508(5) . ?
C011 C022 1.399(5) . ?
O18 C075 1.292(6) . ?
O18 C093 1.462(5) . ?
C012 C062 1.378(5) . ?
C012 C073 1.377(5) . ?
C012 C059 1.506(5) . ?
C013 C022 1.504(4) . ?
C016 C030 1.386(5) . ?
C016 C061 1.513(5) . ?
C018 C055 1.383(5) . ?
C018 C027 1.397(5) . ?
C018 C020 1.511(5) . ?
C019 C043 1.500(5) . ?
C021 C023 1.376(5) . ?
C022 C025 1.384(5) . ?
C023 C042 1.371(5) . ?
C024 C030 1.380(5) . ?
C025 C031 1.373(5) . ?
C026 C048 1.383(5) . ?
C026 C044 1.515(5) . ?
C027 C057 1.393(5) . ?
C028 C033 1.508(5) . ?
C029 C063 1.379(5) . ?
C029 C052 1.382(6) . ?
C029 C065 1.503(5) . ?
C031 C037 1.378(5) . ?
C033 C045 1.387(5) . ?
C035 C050 1.371(6) . ?
C036 C082 1.377(6) . ?
C036 C072 1.384(6) . ?
C036 C054 1.501(5) . ?
C038 C057 1.515(5) . ?
C039 C070 1.483(5) . ?
C040 C050 1.380(6) . ?
O12 C060 1.323(5) . ?
O12 C100 1.467(6) . ?
C043 C064 1.381(5) . ?
C043 C066 1.386(6) . ?
C045 C046 1.373(6) . ?
C046 C048 1.380(5) . ?
C049 C058 1.496(6) . ?
O15 C070 1.212(5) . ?
C051 C083 1.359(7) . ?
C051 C091 1.381(6) . ?
C051 C074 1.509(5) . ?
C052 C087 1.386(6) . ?
C053 C081 1.476(6) . ?
C055 C068 1.374(6) . ?
C056 C060 1.491(5) . ?
C057 C067 1.390(6) . ?
C058 C099 1.368(7) . ?
C058 C090 1.382(7) . ?
C060 O11 1.196(5) . ?
C062 C084 1.384(6) . ?
O8 C078 1.326(5) . ?
O8 C102 1.466(7) . ?
O10 C081 1.289(6) . ?
O10 C095 1.491(7) . ?
C063 C076 1.386(7) . ?
C064 C086 1.386(6) . ?
C066 C092 1.390(7) . ?
C067 C068 1.380(6) . ?
O16 C070 1.290(5) . ?
O16 C111 1.481(8) . ?
C069 C078 1.490(6) . ?
C071 C098 1.477(7) . ?
C072 C088 1.365(6) . ?
C073 C085 1.373(7) . ?
C075 O17 1.190(5) . ?
C075 C077 1.505(6) . ?
C076 C080 1.372(7) . ?
O13 C098 1.186(7) . ?
O7 C078 1.176(5) . ?
C079 C084 1.364(7) . ?
C079 C085 1.377(7) . ?
C080 C087 1.350(7) . ?
C081 O9 1.191(5) . ?
C082 C094 1.387(7) . ?
C083 C113 1.395(8) . ?
C086 C089 1.352(8) . ?
O14 C098 1.309(6) . ?
O14 C114 1.809(14) . ?
C088 C105 1.362(8) . ?
C089 C092 1.364(8) . ?
C090 C097 1.386(9) . ?
C091 C096 1.383(8) . ?
C093 C101 1.450(8) . ?
C094 C105 1.382(9) . ?
C095 C109 1.262(9) . ?
C096 C103 1.314(12) . ?
C097 C104 1.335(11) . ?
C099 C107 1.401(9) . ?
C100 C112 1.374(14) . ?
C102 C106 1.352(11) . ?
C103 C113 1.368(12) . ?
C104 C107 1.356(11) . ?
C108 C114 1.088(12) . ?
C110 C111 1.29(3) . ?
 
loop_
    _geom_angle_atom_site_label_1
    _geom_angle_atom_site_label_2
    _geom_angle_atom_site_label_3
    _geom_angle
    _geom_angle_site_symmetry_1
    _geom_angle_site_symmetry_3
    _geom_angle_publ_flag
C005 O3 C056 115.8(3) . . ?
C007 O5 C039 115.0(3) . . ?
C004 O4 C071 115.1(3) . . ?
C011 O2 C053 114.5(3) . . ?
C027 O1 C069 115.5(3) . . ?
C059 N2 C020 110.8(3) . . ?
C059 N2 C013 109.7(3) . . ?
C020 N2 C013 111.3(3) . . ?
C044 N4 C054 110.2(3) . . ?
C044 N4 C014 110.7(3) . . ?
C054 N4 C014 110.9(3) . . ?
C042 C001 C005 117.3(3) . . ?
C042 C001 C032 121.8(3) . . ?
C005 C001 C032 120.8(3) . . ?
C049 N3 C041 112.1(3) . . ?
C049 N3 C032 111.1(3) . . ?
C041 N3 C032 112.5(3) . . ?
C015 O6 C077 114.7(3) . . ?
C037 C002 C011 117.8(3) . . ?
C037 C002 C041 119.2(3) . . ?
C011 C002 C041 122.9(3) . . ?
C009 C003 C007 117.6(3) . . ?
C009 C003 C017 121.8(3) . . ?
C007 C003 C017 120.5(3) . . ?
C026 C004 O4 119.0(3) . . ?
C026 C004 C033 121.8(3) . . ?
O4 C004 C033 119.0(3) . . ?
C008 C005 C001 122.6(3) . . ?
C008 C005 O3 118.0(3) . . ?
C001 C005 O3 119.2(3) . . ?
C040 C006 C015 117.8(4) . . ?
C040 C006 C047 118.4(3) . . ?
C015 C006 C047 123.7(3) . . ?
C074 N5 C047 112.2(3) . . ?
C074 N5 C061 110.8(3) . . ?
C047 N5 C061 111.5(3) . . ?
C003 C007 C016 122.6(3) . . ?
C003 C007 O5 117.7(3) . . ?
C016 C007 O5 119.5(3) . . ?
C021 C008 C005 118.1(3) . . ?
C021 C008 C034 122.0(3) . . ?
C005 C008 C034 119.8(3) . . ?
C034 N1 C065 109.3(3) . . ?
C034 N1 C038 111.9(3) . . ?
C065 N1 C038 109.1(3) . . ?
C024 C009 C003 120.0(3) . . ?
C017 N6 C028 112.1(3) . . ?
C017 N6 C019 108.5(3) . . ?
C028 N6 C019 108.6(3) . . ?
C035 C010 C015 118.0(3) . . ?
C035 C010 C014 119.0(3) . . ?
C015 C010 C014 122.9(3) . . ?
C002 C011 O2 118.9(3) . . ?
C002 C011 C022 122.4(3) . . ?
O2 C011 C022 118.5(3) . . ?
C075 O18 C093 117.4(4) . . ?
C062 C012 C073 117.5(4) . . ?
C062 C012 C059 122.3(3) . . ?
C073 C012 C059 119.9(4) . . ?
N2 C013 C022 110.8(3) . . ?
N4 C014 C010 111.5(3) . . ?
C006 C015 O6 119.7(3) . . ?
C006 C015 C010 122.1(3) . . ?
O6 C015 C010 118.0(3) . . ?
C030 C016 C007 118.6(3) . . ?
C030 C016 C061 121.7(3) . . ?
C007 C016 C061 119.7(3) . . ?
N6 C017 C003 115.1(3) . . ?
C055 C018 C027 117.7(3) . . ?
C055 C018 C020 120.1(3) . . ?
C027 C018 C020 122.1(3) . . ?
N6 C019 C043 113.9(3) . . ?
N2 C020 C018 111.9(3) . . ?
C023 C021 C008 119.7(3) . . ?
C025 C022 C011 117.7(3) . . ?
C025 C022 C013 119.6(3) . . ?
C011 C022 C013 122.6(3) . . ?
C042 C023 C021 121.9(3) . . ?
C042 C023 Cl5 119.2(3) . . ?
C021 C023 Cl5 118.9(3) . . ?
C009 C024 C030 122.1(3) . . ?
C009 C024 Cl2 118.9(3) . . ?
C030 C024 Cl2 119.0(3) . . ?
C031 C025 C022 120.3(4) . . ?
C048 C026 C004 118.6(3) . . ?
C048 C026 C044 120.3(3) . . ?
C004 C026 C044 120.9(3) . . ?
O1 C027 C057 120.6(3) . . ?
O1 C027 C018 117.2(3) . . ?
C057 C027 C018 122.0(4) . . ?
N6 C028 C033 111.8(3) . . ?
C063 C029 C052 117.4(4) . . ?
C063 C029 C065 121.3(4) . . ?
C052 C029 C065 121.0(4) . . ?
C024 C030 C016 119.1(3) . . ?
C037 C031 C025 121.4(3) . . ?
C037 C031 Cl3 118.8(3) . . ?
C025 C031 Cl3 119.9(3) . . ?
N3 C032 C001 114.4(3) . . ?
C045 C033 C004 117.8(3) . . ?
C045 C033 C028 119.9(3) . . ?
C004 C033 C028 122.3(3) . . ?
N1 C034 C008 115.2(3) . . ?
C050 C035 C010 120.3(4) . . ?
C082 C036 C072 118.2(4) . . ?
C082 C036 C054 120.1(4) . . ?
C072 C036 C054 121.7(4) . . ?
C031 C037 C002 120.3(3) . . ?
N1 C038 C057 111.6(3) . . ?
O5 C039 C070 112.2(3) . . ?
C050 C040 C006 120.3(4) . . ?
N3 C041 C002 110.2(3) . . ?
C023 C042 C001 120.3(3) . . ?
C060 O12 C100 117.5(4) . . ?
C064 C043 C066 117.8(4) . . ?
C064 C043 C019 120.3(4) . . ?
C066 C043 C019 121.8(4) . . ?
N4 C044 C026 112.2(3) . . ?
C046 C045 C033 120.4(3) . . ?
C045 C046 C048 121.1(4) . . ?
C045 C046 Cl4 120.0(3) . . ?
C048 C046 Cl4 118.9(3) . . ?
N5 C047 C006 110.7(3) . . ?
C046 C048 C026 119.8(4) . . ?
N3 C049 C058 114.3(3) . . ?
C035 C050 C040 121.3(3) . . ?
C035 C050 Cl1 120.2(3) . . ?
C040 C050 Cl1 118.5(3) . . ?
C083 C051 C091 117.9(5) . . ?
C083 C051 C074 120.7(4) . . ?
C091 C051 C074 121.3(4) . . ?
C087 C052 C029 121.1(4) . . ?
O2 C053 C081 112.6(4) . . ?
N4 C054 C036 112.6(3) . . ?
C068 C055 C018 120.7(4) . . ?
O3 C056 C060 112.6(3) . . ?
C067 C057 C027 118.2(4) . . ?
C067 C057 C038 118.0(4) . . ?
C027 C057 C038 123.5(4) . . ?
C099 C058 C090 118.0(5) . . ?
C099 C058 C049 120.6(5) . . ?
C090 C058 C049 121.4(5) . . ?
N2 C059 C012 113.4(3) . . ?
O11 C060 O12 124.5(4) . . ?
O11 C060 C056 121.5(4) . . ?
O12 C060 C056 113.9(4) . . ?
N5 C061 C016 114.4(3) . . ?
C012 C062 C084 121.8(4) . . ?
C078 O8 C102 117.5(4) . . ?
C081 O10 C095 119.0(5) . . ?
C029 C063 C076 121.1(5) . . ?
C043 C064 C086 121.2(5) . . ?
N1 C065 C029 113.6(3) . . ?
C092 C066 C043 120.3(5) . . ?
C068 C067 C057 119.6(4) . . ?
C070 O16 C111 115.3(5) . . ?
C055 C068 C067 121.2(4) . . ?
C055 C068 Cl6 119.5(3) . . ?
C067 C068 Cl6 119.2(3) . . ?
O1 C069 C078 113.3(3) . . ?
O15 C070 O16 125.8(4) . . ?
O15 C070 C039 120.8(4) . . ?
O16 C070 C039 113.3(4) . . ?
O4 C071 C098 109.4(4) . . ?
C088 C072 C036 121.4(5) . . ?
C085 C073 C012 120.8(4) . . ?
N5 C074 C051 113.8(3) . . ?
O17 C075 O18 124.4(5) . . ?
O17 C075 C077 120.8(5) . . ?
O18 C075 C077 114.3(3) . . ?
C080 C076 C063 120.3(4) . . ?
O6 C077 C075 109.4(4) . . ?
O7 C078 O8 124.3(4) . . ?
O7 C078 C069 127.2(4) . . ?
O8 C078 C069 108.5(4) . . ?
C084 C079 C085 118.9(5) . . ?
C087 C080 C076 119.4(5) . . ?
O9 C081 O10 123.5(5) . . ?
O9 C081 C053 122.6(5) . . ?
O10 C081 C053 113.9(4) . . ?
C036 C082 C094 120.6(5) . . ?
C051 C083 C113 120.0(6) . . ?
C079 C084 C062 119.8(5) . . ?
C073 C085 C079 121.1(4) . . ?
C089 C086 C064 120.2(5) . . ?
C098 O14 C114 110.6(6) . . ?
C080 C087 C052 120.7(5) . . ?
C105 C088 C072 120.3(5) . . ?
C086 C089 C092 120.0(5) . . ?
C058 C090 C097 120.7(7) . . ?
C096 C091 C051 120.5(7) . . ?
C089 C092 C066 120.5(5) . . ?
C101 C093 O18 108.5(4) . . ?
C105 C094 C082 119.6(5) . . ?
C109 C095 O10 109.5(7) . . ?
C103 C096 C091 121.7(8) . . ?
C104 C097 C090 120.8(7) . . ?
O13 C098 O14 125.3(5) . . ?
O13 C098 C071 123.8(5) . . ?
O14 C098 C071 110.9(5) . . ?
C058 C099 C107 120.1(6) . . ?
C112 C100 O12 108.5(8) . . ?
C106 C102 O8 110.0(7) . . ?
C096 C103 C113 119.0(7) . . ?
C097 C104 C107 119.7(7) . . ?
C088 C105 C094 119.9(5) . . ?
C104 C107 C099 120.6(8) . . ?
C110 C111 O16 106.6(16) . . ?
C103 C113 C083 120.7(8) . . ?
C108 C114 O14 83.4(15) . . ?
 
